# Supplementary material
Source: PubMed Central journal article supplement (PMC5621962)
Supplement: supp_5.3.E623_2017-0052-3-at.pdf [file supp_5.3.E623_2017-0052-3-at.pdf]

**Appendix 3, supplemental Table S1 (as supplied by the authors): Unadjusted event rates over follow-up**

| Characteristic              | All     | Age 65-74y |             | Age 75-84y |             | Age 85y+ |             |
|-----------------------------|---------|------------|-------------|------------|-------------|----------|-------------|
|                             |         | Dementia   | No dementia | Dementia   | No dementia | Dementia | No dementia |
| N                           | 610,457 | 5,424      | 435,151     | 8,652      | 115,957     | 9,772    | 35,501      |
| Mortality                   | 21.6    | 43.6       | 10.5        | 59.6       | 22.4        | 75.7     | 39.2        |
| Physician visits            | 1,795.0 | 4,890.1    | 1,393.1     | 4,404.4    | 1,795.1     | 4,318.9  | 1,845.4     |
| ED visits                   | 70.7    | 148.3      | 55.1        | 140.5      | 73.4        | 127.0    | 89.2        |
| Hospitalizations            | 24.4    | 73.5       | 15.9        | 71.5       | 24.6        | 64.8     | 32.4        |
| Discharge to long-term care | 3.7     | 22.6       | 0.4         | 31.6       | 1.2         | 44.7     | 4.2         |

N count. Rates are per 100 person-years

ED = emergency department
