# Supplementary material
Source: PubMed Central journal article supplement (PMC5621962)
Supplement: supp_5.3.E623_2017-0052-4-at.pdf [file supp_5.3.E623_2017-0052-4-at.pdf]

**Appendix 4, supplemental Table S2 (as supplied by the authors): Adjusted risk multiplier for dementia by age and number of morbidities in the oldest participants**

| Morbidities  | No of participant-years (%) | Mortality           | Physician visits    | ED visits           | Hospitalizations    | Discharge to long-term care |
|--------------|-----------------------------|---------------------|---------------------|---------------------|---------------------|-----------------------------|
|              |                             | HR (95%CI)          | RR (95%CI)          | RR (95%CI)          | RR (95%CI)          | HR (95%CI)                  |
| Age 85-89 y  | 371,349                     |                     |                     |                     |                     |                             |
| None         | 31,025 (8.4)                | 4.37 (4.09,4.66)    | 3.47 (3.35,3.59)    | 4.06 (3.64,4.52)    | 7.79 (6.62,9.16)    | 35.15 (24.65,50.13)         |
| One          | 40,346 (10.9)               | 2.14 (2.06,2.23)    | 1.46 (1.43,1.48)    | 1.83 (1.74,1.94)    | 3.29 (3.04,3.56)    | 8.24 (7.00,9.69)            |
| Two          | 63,481 (17.1)               | 2.14 (2.08,2.20)    | 1.30 (1.29,1.32)    | 1.63 (1.57,1.69)    | 2.67 (2.54,2.81)    | 4.90 (4.43,5.42)            |
| Three        | 68,628 (18.5)               | 2.03 (1.98,2.09)    | 1.25 (1.24,1.27)    | 1.45 (1.41,1.49)    | 2.27 (2.18,2.36)    | 2.98 (2.76,3.21)            |
| Four         | 57,909 (15.6)               | 1.87 (1.82,1.92)    | 1.22 (1.20,1.23)    | 1.31 (1.27,1.34)    | 1.78 (1.71,1.84)    | 1.86 (1.75,1.98)            |
| Five or more | 109,960 (29.6)              | 1.53 (1.51,1.56)    | 1.21 (1.20,1.22)    | 1.21 (1.19,1.23)    | 1.47 (1.44,1.50)    | 1.29 (1.25,1.33)            |
| Age 90-94 y  | 168,388                     |                     |                     |                     |                     |                             |
| None         | 18,149 (10.8)               | 6.35 (5.85,6.89)    | 6.05 (5.79,6.33)    | 5.38 (4.66,6.22)    | 12.15 (9.67,15.27)  | 30.10 (19.04,47.57)         |
| One          | 15,026 (8.9)                | 1.96 (1.87,2.06)    | 1.67 (1.63,1.71)    | 1.72 (1.60,1.85)    | 2.94 (2.64,3.28)    | 4.44 (3.69,5.35)            |
| Two          | 25,454 (15.1)               | 1.86 (1.79,1.93)    | 1.43 (1.41,1.45)    | 1.44 (1.37,1.51)    | 2.51 (2.35,2.68)    | 2.53 (2.27,2.82)            |
| Three        | 29,431 (17.5)               | 1.77 (1.72,1.83)    | 1.34 (1.32,1.36)    | 1.22 (1.17,1.26)    | 1.87 (1.77,1.96)    | 1.93 (1.78,2.10)            |
| Four         | 26,489 (15.7)               | 1.64 (1.58,1.69)    | 1.29 (1.28,1.31)    | 1.15 (1.11,1.19)    | 1.56 (1.50,1.63)    | 1.40 (1.31,1.49)            |
| Five or more | 53,839 (32.0)               | 1.42 (1.39,1.45)    | 1.24 (1.23,1.26)    | 1.02 (1.00,1.04)    | 1.21 (1.18,1.24)    | 1.11 (1.07,1.15)            |
| Age 95 y+    | 70,811                      |                     |                     |                     |                     |                             |
| None         | 21,391 (30.2)               | 19.57 (17.36,22.06) | 25.60 (23.89,27.44) | 14.04 (11.17,17.65) | 26.93 (19.01,38.15) | 54.52 (31.64,93.94)         |
| One          | 5,407 (7.6)                 | 2.12 (1.97,2.29)    | 2.05 (1.96,2.13)    | 1.46 (1.29,1.65)    | 2.21 (1.84,2.66)    | 2.14 (1.72,2.67)            |
| Two          | 8,193 (11.6)                | 1.69 (1.60,1.79)    | 1.61 (1.57,1.66)    | 1.15 (1.06,1.24)    | 1.69 (1.50,1.89)    | 1.78 (1.54,2.06)            |
| Three        | 9,832 (13.9)                | 1.60 (1.52,1.68)    | 1.45 (1.42,1.49)    | 0.95 (0.89,1.01)    | 1.28 (1.17,1.39)    | 1.16 (1.05,1.29)            |
| Four         | 8,843 (12.5)                | 1.40 (1.33,1.48)    | 1.36 (1.33,1.39)    | 0.90 (0.85,0.95)    | 1.03 (0.95,1.11)    | 1.04 (0.95,1.14)            |
| Five or more | 17,145 (24.2)               | 1.35 (1.30,1.40)    | 1.29 (1.26,1.31)    | 0.90 (0.87,0.93)    | 1.02 (0.98,1.07)    | 0.98 (0.92,1.03)            |

CI = confidence interval, HR = hazard ratio, RR - rate ratio, ED = emergency department

Ratios are adjusted for sex, Aboriginal status, and rural/urban. These models include 3-way and 2-way interactions terms for dementia, age, and number of morbidities.

The Table shows the likelihood of a two-fold increase in the risk of the outcomes with repeat events (i.e., physician visits, ED visits, hospitalizations) that is associated with dementia, along with the risk of mortality and discharge to long-term care. For example, a two-fold increase in the number of physician visits is 3.47 times more likely among those who are aged 85-89 years with no comorbidities except for dementia, as compared to those of similar age, also with no comorbidities including no dementia.
