# Supplementary material
Source: PubMed Central journal article supplement (PMC5621962)
Supplement: supp_5.3.E623_2017-0052_original_submission.pdf [file supp_5.3.E623_2017-0052_original_submission.pdf]

1  
2  
3 **Multimorbidity, dementia and health care in older people: a population-based cohort**  
4 **study**  
5  
6

7 Marcello Tonelli, Department of Medicine, University of Calgary, Calgary, Canada  
8 [cello@ucalgary.ca](mailto:cello@ucalgary.ca)

9 Natasha Wiebe, Department of Medicine, University of Alberta, Edmonton, Canada  
10 [nwiebe@ualberta.ca](mailto:nwiebe@ualberta.ca)

11 Sharon Straus, Department of Medicine, University of Toronto, Toronto, Canada  
12 [sharon.straus@utoronto.ca](mailto:sharon.straus@utoronto.ca)

13 Martin Fortin, Department of Family Medicine, Université de Sherbrooke, Sherbrooke,  
14 Canada  
15 [Martin.Fortin@usherbrooke.ca](mailto:Martin.Fortin@usherbrooke.ca)

16 Bruce Guthrie, Population Health Sciences Division, Medical Research Institute,  
17 University of Dundee, Dundee, UK  
18 [b.guthrie@dundee.ac.uk](mailto:b.guthrie@dundee.ac.uk)

19 Matthew T James, Department of Medicine, University of Calgary, Calgary, Canada  
20 [mjames@ucalgary.ca](mailto:mjames@ucalgary.ca)

21 Scott W Klarenbach, Department of Medicine, University of Alberta, Edmonton, Canada  
22 [swk@ualberta.ca](mailto:swk@ualberta.ca)

23 Helen Tam-Tham, Department of Medicine, University of Calgary, Calgary, Canada  
24 [tamh@ucalgary.ca](mailto:tamh@ucalgary.ca)

25 Richard Lewanczuk, Alberta Health Services, Edmonton, Canada  
26 [richard.lewanczuk@ahs.ca](mailto:richard.lewanczuk@ahs.ca)

27 Braden J Manns, Department of Medicine, University of Calgary, Calgary, Canada  
28 [Braden.Manns@ahs.ca](mailto:Braden.Manns@ahs.ca)

29 Hude Quan, Department of Community Health Sciences, University of Calgary, Calgary,  
30 Canada  
31 [hquan@ucalgary.ca](mailto:hquan@ucalgary.ca)

32 Paul E Ronksley, Department of Community Health Sciences, University of Calgary,  
33 Calgary, Canada  
34 [peronksl@ucalgary.ca](mailto:peronksl@ucalgary.ca)

35 Peter Sargious, Alberta Health Services, Edmonton, Canada  
36 [peter.sargious@ahs.ca](mailto:peter.sargious@ahs.ca)

37 Brenda Hemmelgarn, Department of Medicine, University of Calgary, Calgary, Canada  
38 [Brenda.Hemmelgarn@ahs.ca](mailto:Brenda.Hemmelgarn@ahs.ca)

39  
40  
41  
42  
43  
44  
45  
46  
47  
48 *for the Alberta Kidney Disease Network*

49  
50  
51  
52 **Running Title:** Age, morbidity and dementia

53  
54  
55  
56  
57 **No reprints will be available. Correspondence to:**

1  
2  
3  
4  
5  
6  
7  
8  
9  
10  
11  
12  
13  
14  
15  
16  
17  
18  
19  
20  
21  
22  
23  
24  
25  
26  
27  
28  
29  
30  
31  
32  
33  
34  
35  
36  
37  
38  
39  
40  
41  
42  
43  
44  
45  
46  
47  
48  
49  
50  
51  
52  
53  
54  
55  
56  
57  
58  
59  
60

Marcello Tonelli, University of Calgary  
7th Floor, TRW Building, 3280 Hospital Drive NW  
Calgary, Alberta, Canada T2N 4Z6  
Tel: 403 210 6930  
Fax: 403 270 1828

**Key words:** multimorbidity, dementia, older adults

Confidential

## ABSTRACT

**Background:** Multimorbidity and dementia are key challenges for health systems worldwide and their prevalence increases with age. Little is known about how multimorbidity, dementia, and increasing age combine to influence health outcomes or utilization.

**Methods:** We did a retrospective population-based cohort study of all 610,457 adults aged  $\geq 65$  years residing in Alberta, Canada between 2002 and 2013. We used validated algorithms applied to administrative and laboratory data from the provincial health ministry to assess the presence/absence of dementia and 29 other morbidities, as well as clinical outcomes (death; emergency department visits; all-cause hospitalization) and a proxy for loss of independent living (discharge to long-term care). Cox and Poisson models were adjusted for year-varying covariates.

**Results:** Over median follow-up of 6.8 years, 153,125 (25%) participants died and 5,569 (1%) were discharged to long-term care. At baseline, the median number of conditions was 2 (range 1 to 3). The prevalence of dementia rose over time by approximately 0.2% per year from 6.2% in fiscal year 2003 to 8.3% in fiscal year 2012, representing a net increase of approximately 13,700 people. The likelihood of all clinical outcomes (death; physician claims; emergency department visits; all-cause hospitalization; discharge to a long-term care facility), increased with increasing age and with greater burden of morbidity. The presence of dementia further increased the risk of all clinical outcomes,

1  
2  
3 especially for mortality and discharge to a long-term care facility. The absolute  
4  
5  
6 proportion of participants discharged to a long-term care facility was 0·6, 3·3 and 12·0%  
7  
8  
9 for those aged 65-74, 75-84, and ≥85 years respectively; among those ≥85 years, these  
10  
11 proportions were 1·7, 2·6 and 4·8% for those with 2, 3 or 4 morbidities but without  
12  
13 dementia, and 28·0, 35·6 and 37·6% for those with 2, 3 or 4 morbidities as well as  
14  
15 dementia.  
16  
17  
18  
19  
20

21 **Interpretation:** Dementia acts as a risk multiplier across all age and morbidity  
22  
23 strata; the presence of dementia is associated with excess risk of adverse health  
24  
25 outcomes including death and discharge to a long-term care facility. The increasing  
26  
27 prevalences of dementia and multimorbidity over time suggest the need for coordinated  
28  
29 national strategies aimed at mitigating the health challenges associated with the aging  
30  
31 population.  
32  
33  
34  
35  
36  
37  
38  
39  
40  
41  
42  
43  
44  
45  
46  
47  
48  
49  
50  
51  
52  
53  
54  
55  
56  
57  
58  
59  
60

## INTRODUCTION

Many people have multiple chronic conditions, which is termed multimorbidity.<sup>1</sup>

Multimorbidity is common and associated with worse clinical outcomes and higher health care costs, compared to good health or to the presence of a single chronic condition.<sup>2-5</sup> Multimorbidity increases in parallel with age, and multimorbidity among older people is felt to be a key driver of health care costs and the sustainability of health systems worldwide.<sup>6</sup> Dementia is also an age-related condition that poses a major societal burden, and some evidence suggests that dementia is more common in the presence of multimorbidity.<sup>7-11</sup>

The prevalences of older age, multimorbidity and dementia are all projected to increase over the next few decades. However, there are major knowledge gaps concerning the basic epidemiology of multimorbidity among older people; its clinical and economic consequences; and the link between dementia, increasing age and multimorbidity<sup>12</sup>. It is uncertain whether higher levels of morbidity are accompanied by increasing prevalence of dementia in all age strata, and whether dementia is associated with excess risk of adverse outcomes even in the setting of multimorbidity or advanced age. It is especially important to clarify how these three inter-related factors interact to influence the capacity to live independently, which is a key outcome for patients, families and policy-makers.

1  
2  
3 We used a population-based dataset of people aged 65 years or greater and living in  
4  
5  
6 **Alberta, a Canadian province with 4 million people**, to characterize the frequency of  
7  
8 dementia and 29 other common chronic conditions. We examined the joint associations  
9  
10 between age, dementia, and burden of morbidity with clinical outcomes (mortality,  
11  
12 physician visits, emergency department visits, and hospitalizations). We also aimed to  
13  
14 describe the relationship between increasing age, dementia, multimorbidity, and loss of  
15  
16 capacity for independent living, defined by discharge to a long-term care facility.  
17  
18  
19  
20  
21  
22

## 23 **METHODS**

24  
25  
26 This retrospective population-based cohort study is reported according to the STROBE  
27  
28 guidelines.<sup>13</sup> The institutional review boards at the Universities of Alberta and Calgary  
29  
30 approved this study.  
31  
32  
33  
34  
35

### 36 *Data sources and cohort*

37  
38 We used the Alberta Kidney Disease Network (AKDN) database, which incorporates data  
39  
40 from Alberta Health (AH; the provincial health ministry) such as physician claims,  
41  
42 hospitalizations and ambulatory care utilization; the Northern and Southern Alberta  
43  
44 Renal Programs (NARP and SARP); and the clinical laboratories in Alberta. **This database**  
45  
46 **has been widely used<sup>14-16</sup> because of its population-based coverage of a geographically**  
47  
48 **defined area, including demographic characteristics, health services utilization, and**  
49  
50 **clinical outcomes. Additional information on the database is available elsewhere,**  
51  
52 **including the validation of selected data elements.<sup>17</sup> All people registered with AH were**  
53  
54  
55  
56  
57  
58  
59  
60

1  
2  
3 included in the database; all Alberta residents are eligible for insurance coverage by AH  
4  
5 and >99% participate in coverage. The database was used to assemble a cohort of adults  
6  
7 aged  $\geq 65$  years who resided in Alberta, Canada between May 2002 and March 2013. We  
8  
9 followed participants from May 2002, their 65<sup>th</sup> birthday, or registration with AH  
10  
11 (whichever was later) until March 2013, death, or migration out of the province.  
12  
13  
14  
15

### 16 17 18 *Comorbidities*

19  
20 Informed by a systematic review of multimorbidity measures,<sup>18</sup> the Quality and  
21  
22 Outcomes Framework of the UK General Practice contract, and health service planning  
23  
24 by NHS Scotland, Barnett *et al* identified a set of 40 morbidities and used them to  
25  
26 generate a comprehensive assessment of multimorbidity in the UK. We aimed to use the  
27  
28 same set of morbidities in our work, but the Barnett study used administrative codes  
29  
30 from NHS Scotland, which are not available in Canada. From this set, we found and  
31  
32 published validated algorithms for 29 chronic conditions that could be applied to  
33  
34 Canadian claims data and had positive predictive values  $\geq 70\%$ <sup>19</sup>: alcohol misuse, asthma,  
35  
36 atrial fibrillation, lymphoma, non-metastatic cancer (breast, cervical, colorectal,  
37  
38 pulmonary, and prostate), metastatic cancer, chronic heart failure, chronic pain, chronic  
39  
40 obstructive pulmonary disease, chronic hepatitis B, cirrhosis, severe constipation,  
41  
42 dementia, depression, diabetes, epilepsy, hypertension, hypothyroidism, inflammatory  
43  
44 bowel disease, irritable bowel syndrome, multiple sclerosis, myocardial infarction,  
45  
46 Parkinson's disease, peptic ulcer disease, peripheral vascular disease, psoriasis,  
47  
48 rheumatoid arthritis, schizophrenia, and stroke or transient ischemic attack. Dementia  
49  
50  
51  
52  
53  
54  
55  
56  
57  
58  
59  
60

1  
2  
3 was one of the 29 conditions and was defined by the presence of 1 hospitalization or 2  
4  
5 physician claims within 2 years (ICD-9 290, 294.1, 331.2 or ICD-10 F00-F03, F05.1, G30,  
6  
7 G31.1).<sup>20</sup> We also considered chronic kidney disease (CKD) as a 30<sup>th</sup> condition that was  
8  
9 defined by mean annual estimated glomerular filtration rate (eGFR)  $<60 \text{ mL/min} \cdot 1.73 \text{ m}^2$   
10  
11 or a median annual presence of albuminuria (albumin:creatinine ratio  $\geq 30 \text{ mg/g}$ ,  
12  
13 protein:creatinine ratio  $\geq 150 \text{ mg/g}$  or dipstick proteinuria  $\geq$  trace). Each participant was  
14  
15 classified with respect to the presence or absence of dementia and 29 other chronic  
16  
17 conditions for each fiscal year.<sup>21</sup> If a participant developed a condition **considered to be**  
18  
19 **permanent** within a fiscal year or at any point previously (lookback extended as far as  
20  
21 April 1994 where records were available), they were classified as having the condition  
22  
23 **for that fiscal year and every ensuing year of follow-up. Conditions not considered to be**  
24  
25 **permanent, such as lymphoma, were considered to remit a fixed number of years after**  
26  
27 **the last contiguous instance meeting the requirements of the algorithm. For example,**  
28  
29 **lymphoma was considered to absent after five years from the date when criteria for its**  
30  
31 **presence were no longer met.** Detailed methods for classifying morbidity status and the  
32  
33 specific algorithms used are found elsewhere.<sup>19</sup>  
34  
35  
36  
37  
38  
39  
40  
41  
42  
43  
44  
45

#### 46 *Clinical outcomes*

47  
48 The primary outcome was time to all-cause death. Key secondary outcomes included  
49  
50 the rate of physician visits (primary care or specialists), the rate of emergency  
51  
52 department (ED) visits, and the rate of hospitalizations. We also evaluated loss of  
53  
54 capacity for independent living, which was defined by first discharge to a **public or**  
55  
56  
57  
58  
59  
60



1  
2  
3 **private** long-term care facility (e.g., nursing homes, auxiliary hospitals) following any  
4  
5  
6 hospital admission.  
7

### 8 9 10 11 *Statistical analyses*

12  
13 We did analyses with Stata MP 13.1 ([www.stata.com](http://www.stata.com)) and reported baseline (first year  
14  
15 within follow-up) descriptive statistics as counts and percentages, or medians and inter-  
16  
17 quartile ranges, as appropriate. Spine plots (multi-variable stacked bar graphs) were  
18  
19 used to depict mortality, discharge to long-term care, and burden of dementia by age  
20  
21 and number of morbidities. Secular trend of prevalent dementia was assessed using an  
22  
23 autoregressive model of order 1. Analyses were aimed at the interactions between the  
24  
25 specific exposures of dementia, number of non-dementia morbidities, and age.  
26  
27  
28  
29  
30  
31  
32

33  
34 In order to examine the associations between dementia, increasing morbidity burden  
35  
36 and age with the clinical outcomes, we used a number of models: Cox regression for  
37  
38 mortality and long-term care placements; and generalized linear regression using the  
39  
40 Poisson distribution with a log-link for the rates of physician claims, ED visits, and  
41  
42 hospitalizations (all separately) **and a random intercept term for participant. To meet**  
43  
44 **Poisson modelling assumptions**, we analyzed the doubling of events (claims, ED visits,  
45  
46 and hospitalizations) rather than absolute increments of 1 event. Outcomes were  
47  
48 regressed on dementia, the number of other (non-dementia) morbidities (categorized as  
49  
50 none, 1, 2, 3, 4, and 5 or more), age (categorized as 65-74, 75-84, and ≥85 years), their  
51  
52 3-way interaction and all three 2-way interactions; also sex, Aboriginal status (registered  
53  
54  
55  
56  
57  
58  
59  
60

1  
2  
3 First Nations or recognized Inuit), social assistance, and rural or urban residence. All  
4  
5  
6 covariates were allowed to vary on a year-by-year basis. We also did additional analyses  
7  
8  
9 that further examined the oldest age groups categorized as 85-89, 90-95, and  $\geq 95$  years.

10  
11  
12  
13 The requirement for 3-way interaction terms was confirmed by plotting the natural  
14  
15  
16 logarithm of the outcome ratio against age category for each number of morbidity  
17  
18  
19 groups (a separate connected line for each group) for both the dementia group and the  
20  
21  
22 group without dementia and checking for non-additive lines. We determined that the  
23  
24  
25 proportional hazard assumption was satisfied by examining plots of the log-negative-log  
26  
27  
28 of within-group survivorship probabilities versus log-time. For Poisson modeling, we  
29  
30  
31 verified that the variances approximately equaled the means. The threshold  $p$  for  
32  
33  
34 statistical significance was set at 0.05.

### 35 36 *Role of the funding source*

37  
38 This study is based in part by data provided by Alberta Health and Alberta Health  
39  
40  
41 Services. The interpretation and conclusions are those of the researchers and do not  
42  
43  
44 represent the views of the Government of Alberta. The funders had no role in the design  
45  
46  
47 or analysis of this study, nor the drafting or approval of this manuscript. Neither the  
48  
49  
50 Government of Alberta nor Alberta Health express any opinion in relation to this study.  
51  
52  
53 The corresponding author has access to all the data in the study and takes responsibility  
54  
55  
56 for the integrity of the data and the accuracy of the data analysis.  
57  
58  
59  
60

## RESULTS

### *Characteristics of study participants*

Participant flow is shown in Supplemental Figure 1. There were 610,457 participants aged 65 years or greater; median follow-up was 6·8 years (range 1 day to 10·9 years; 2% of participant out-migrated before the end of follow-up). Participants were 53% female, median age was 66 years at baseline (range 65 to 110), 1% were Aboriginal, and 15% resided in a rural location (Table 1). The median number of non-dementia morbidities was 2 (range 0 to 16); the percentage of participants with 5 or more morbidities was 9%.

The prevalence of dementia rose over time by approximately 0·2% per year from 6·2% in fiscal year 2003 to 8·3% in fiscal year 2012, representing a net increase of approximately 13,700 people. Adjustment for mean age did not attenuate the prevalence of dementia over time. For all age strata, the prevalence of dementia increased in parallel with the number of non-dementia morbidities (Figure 1).

### *Unadjusted likelihood of outcomes*

During follow-up, 25% of participants died and 0.9% of all participants were discharged into long-term care. The rate of physician claims was 1,795 per 100 person-years, the rate of ED visits was 71 per 100 person-years and hospitalization rate was 24 per 100 person-years. Unadjusted rates of mortality and discharge to long-term care increased with increasing age for people with and without dementia. Unadjusted rates of physician visits, ED visits and hospitalization increased with age among people without dementia, but decreased with age among those with dementia (Supplemental Table 1).

### *Adjusted likelihood of outcomes*

The likelihood of all clinical outcomes (death; physician claims; ED visits; all-cause hospitalization; discharge to a long-term care facility) tended to increase with greater burden of morbidity (Figure 2), regardless of whether dementia was present or not. The exceptions were all-cause mortality (for which there was evidence of a J-shaped relation among those with dementia: with lowest risk of death observed among those with 2-3 morbidities) and for discharge to a long-term care facility among people with dementia (the likelihood of which decreased with increasing morbidity) (Figure 2). **The explanation for the J-shaped relation is unclear but we speculate that increased medical attention associated with management of relatively mild comorbidity burden helped to mitigate the mortality penalty associated with dementia per se. Mortality increased with increasing number of morbidities in participants with and without dementia even after**

1  
2  
3 exclusion of morbidities such as myocardial infarction, hypertension, diabetes, and heart  
4  
5 failure (data not shown).  
6  
7  
8  
9

10  
11 The presence of dementia increased the risk of all clinical outcomes, regardless of age  
12 and level of morbidity; the excess risk was especially pronounced for mortality and for  
13 discharge to a long-term care facility (Figure 2). However, the magnitude of the excess  
14 risk for discharge to long-term care that was associated with dementia appeared to  
15 decrease with increasing age and morbidity (Table 2; Figure 2). For example, among  
16 people with no morbidities, the HRs for discharge to long-term care associated with  
17 dementia (vs no dementia) were 179.85 (127.52, 253.66), 65.57 (48.64, 88.40) and 22.00  
18 (17.15, 28.24) among people aged 65-74, 75-84 and  $\geq 85$  years, respectively (all  
19  $p$ 's<0.001). Among those aged  $\geq 85$  years, the HRs associated with dementia for  
20 discharge to long-term care among those with 1, 2 and 3 morbidities were 3.48 (3.13,  
21 3.88), 2.29 (2.14, 2.45) and 1.63 (1.56, 1.72), respectively (all  $p$ 's<0.001). The magnitude  
22 of the excess risks for physician visits, ED visits or all-cause hospitalization that were  
23 associated with dementia all appeared to decrease with increasing morbidity, but were  
24 not consistently modified by age (Table 2; Figure 2). These patterns were also seen  
25 when only participants aged  $\geq 85$  years were considered (Supplemental Table 2).  
26  
27  
28  
29  
30  
31  
32  
33  
34  
35  
36  
37  
38  
39  
40  
41  
42  
43  
44  
45  
46  
47  
48  
49  
50

51 In contrast to these relative trends in the prognostic importance of dementia, the  
52 absolute percentages of participants who died and of those discharged to a long-term  
53 care facility (rather than home) increased in parallel with age and number of chronic  
54  
55  
56  
57  
58  
59  
60

1  
2  
3 conditions; the presence of dementia acted as a risk multiplier for both of these adverse  
4  
5 outcomes, regardless of age or morbidity burden (Figure 3). For example, the absolute  
6  
7 likelihood of discharge to a long-term care facility (over a 5-year period) was 0·6, 3·3 and  
8  
9 12·0% for those aged 65-74, 75-84, and  $\geq 85$  years respectively; among those  $\geq 85$  years,  
10  
11 these proportions were 1·7, 2·6, 4·8 and 10·7% for those with 2, 3, 4, or  $\geq 5$  morbidities  
12  
13 but without dementia, and 28·0, 35·6, 37·6 and 46·9% for those with 2, 3, 4, or  $\geq 5$   
14  
15 morbidities as well as dementia.  
16  
17  
18  
19  
20

## 21 22 23 **INTERPRETATION**

### 24 25 *Main findings*

26  
27  
28 In this population-based study of more than 600,000 community-dwelling people aged  
29  
30 65 years and older, we examined how increasing age and burden of chronic conditions  
31  
32 modify the association between dementia and adverse health outcomes. As previously  
33  
34 reported, the risk of poor outcomes increases in parallel with age and the number of  
35  
36 morbidities.<sup>2,22</sup> We found that the presence of dementia acted as a risk multiplier across  
37  
38 all age and morbidity strata – leading to worse health outcomes, especially for the risks  
39  
40 of death or discharge to a long-term care facility. Although the clinical impact of  
41  
42 dementia is already considerable, we also found a relatively slow but consistent increase  
43  
44 in the prevalence of dementia over time: 0·2% per year, or approximately 13,700 people  
45  
46 per decade in Alberta. To put this statistic into context, the current capacity of Alberta's  
47  
48 long-term care facilities is approximately 14,000 people. While not all people with  
49  
50 dementia will lose the capacity to live independently, these findings have clear  
51  
52  
53  
54  
55  
56  
57  
58  
59  
60

1  
2  
3 implications for health systems and those responsible for planning and providing long-  
4  
5 term care.  
6  
7

### 8 9 10 *Comparison with previous studies*

11  
12 Driven by lower birth rates and longer life expectancy, the proportion of older people in  
13  
14 the general population is steadily increasing worldwide.<sup>7</sup> Longer lifetimes and the  
15  
16 potential societal benefits associated with these demographic changes are to be  
17  
18 celebrated, but population aging also poses numerous challenges for policy-makers.  
19  
20 Although the age-related nature of both multimorbidity and dementia are both well  
21  
22 known, few studies have examined how the interplay between these three  
23  
24 characteristics influence health outcomes or the capacity for independent living.  
25  
26 Available studies demonstrate that increased morbidity burden is associated with higher  
27  
28 prevalence and severity of dementia and cognitive impairment,<sup>8-11,23</sup> but are limited by  
29  
30 relatively small sample size and lack of longitudinal follow-up for clinical outcomes or  
31  
32 resource use. Possible explanations for the high prevalence of comorbidities in people  
33  
34 with dementia include common risk factors (e.g., unhealthy diet), a common causal  
35  
36 pathway (e.g., atherosclerosis), adverse effects of medications used to treat medical  
37  
38 morbidity, or other iatrogenic factors (e.g., subclinical stroke following angioplasty for  
39  
40 coronary disease).  
41  
42  
43  
44  
45  
46  
47  
48  
49  
50

51  
52 The landmark House of Lords report entitled “*Ready For Aging?*” focused on the  
53  
54 implications of the aging population for the UK during 2020–2030,<sup>24</sup> and singled out  
55  
56  
57  
58  
59  
60

1  
2  
3 dementia as an age-related condition that will require specific policy remedies aimed at  
4 prevention, management, harm reduction, and social inclusion. Our findings strongly  
5 validate this conclusion -- and suggest that there would be considerable potential  
6 benefits for national strategies on population aging generally and on the policy  
7 implications of dementia specifically. Potential areas of focus for such strategies could  
8 include health promotion (reducing the risk of dementia and other morbidities), self-  
9 care (perhaps through increased use of technology to improve function and reduce  
10 disability) tailored care for older patients with multimorbidity (accounting for  
11 interactions between conditions and the medications used to treat them, as well as side  
12 effects of medicine that are more common with increasing age), better integration  
13 between health and social care (to delay or prevent loss of independent living), and  
14 ensuring that the workforce has sufficient capacity and expertise to meet the needs of  
15 older people.<sup>25-27</sup>

### 16 17 18 19 20 21 22 23 24 25 26 27 28 29 30 31 32 33 34 35 36 37 38 *Strengths and limitations*

39  
40 Our study has important strengths, including its use of a large population-based  
41 database from a setting with universal health care coverage, its use of validated  
42 algorithms for ascertaining the presence or absence of morbidity, and its rigorous  
43 analytical methods. However, our study also has several potential limitations that  
44 should be considered when interpreting results. First, like all studies using  
45 administrative data, residual confounding is possible by unmeasured characteristics (e.g.  
46 smoking, physical activity, and the extent of support from family members and other  
47  
48  
49  
50  
51  
52  
53  
54  
55  
56  
57  
58  
59  
60



1  
2  
3 caregivers), and not all data elements have been validated. Second, since participants  
4  
5 must use medical services to be diagnosed with chronic conditions, the use of  
6  
7 administrative data to identify morbidities will underestimate the true population  
8  
9 burden of dementia and other morbidities. Similarly, the excess risk associated with  
10  
11 milder forms of dementia not requiring medical attention may be less pronounced than  
12  
13 suggested here. In addition, we did not have algorithms for certain potentially  
14  
15 important morbidities such as osteoporosis and frailty. However, given that utilization of  
16  
17 medical services increases with age, our focus on people aged  $\geq 65$  years at baseline  
18  
19 should reduce the extent of such underestimation. Third, when applied to ICD-10 claims,  
20  
21 the validated algorithm that we used for dementia has positive predictive value of 93%  
22  
23 and sensitivity of 67%, as compared to a clinical gold standard.<sup>20</sup> Therefore, our findings  
24  
25 will underestimate the true prevalence of dementia in Alberta. Fourth, our claims  
26  
27 database only allowed us to identify people who were discharged from hospital to a  
28  
29 long-term care facility. Since some older people enter long-term care facilities directly  
30  
31 from home, our findings will underestimate the total percentage of people within each  
32  
33 age stratum who eventually require long-term care. Fifth, we did not report on the  
34  
35 incidence of dementia, because our design better captures prevalent cases; patients  
36  
37 who develop dementia but die before they are captured as having dementia in claims  
38  
39 data will be incorrectly omitted from estimates of dementia incidence but correctly  
40  
41 omitted for estimates of dementia prevalence. Sixth, we studied people from a single  
42  
43 Canadian province and our findings may not apply to other settings, although the  
44  
45 relevant demographic and healthcare challenges are shared with all developed and  
46  
47  
48  
49  
50  
51  
52  
53  
54  
55  
56  
57  
58  
59  
60

1  
2  
3 many developing countries.  
4  
5  
6

7 *Conclusions and implications for policy and future research*  
8

9  
10 Like multimorbidity, the prevalence of dementia increases with increasing age, and age,  
11 morbidity and dementia together are strongly correlated with adverse health outcomes  
12 and a proxy for loss of independent living. These findings and the secular trends in the  
13 population prevalence of dementia suggest the need for coordinated national strategies  
14 to mitigate the health challenges associated with the aging general population.  
15  
16  
17  
18  
19  
20

21 *Additional research is required to determine how best to promote health, reduce*  
22 *disability and improve self-management in older people with multimorbidity, dementia*  
23 *or both.*  
24  
25  
26  
27  
28  
29  
30  
31  
32  
33  
34  
35  
36  
37  
38  
39  
40  
41  
42  
43  
44  
45  
46  
47  
48  
49  
50  
51  
52  
53  
54  
55  
56  
57  
58  
59  
60

Confidential

## CONTRIBUTORS

MT and SS conceived the study. MT and NW designed the study and drafted the manuscript. NW performed the statistical analyses. All authors have made substantial contributions to the development of the manuscript, all have been involved in revising it for important intellectual content and all approved the final version. MT had full access to all of the data in the study and takes responsibility for the integrity of the data and the accuracy of the data analysis.

## DISCLOSURES

The authors have no relevant conflicts of interest.

## FUNDING

This work was supported by the Canadian Institutes for Health Research (MOP 133582), by a team grant to the Interdisciplinary Chronic Disease Collaboration from Alberta Innovates-Health Solutions and a Leaders Opportunity Fund grant from the Canada Foundation for Innovation. MT, HQ, and SK are supported by career salary awards from Alberta Innovates-Health Solutions.

## ACKNOWLEDGEMENTS

This authors of this report are grateful to Sophanny Tiv for figure construction and Ghenette Houston for administrative support.

## References

1. Fortin M, Lapointe L, Hudon C, Vanasse A. Multimorbidity is common to family practice. Is it commonly researched? *Can Fam Physician*. 2005;51:244-5.
2. Barnett K, Mercer SW, Norbury M, Watt G, Wyke S, Guthrie B. Epidemiology of multimorbidity and implications for health care, research, and medical education: a cross-sectional study. *Lancet*. 2012;380:37-43.
3. Fortin M, Hudon C, Haggerty J, van den Akker M, Almirall J. Prevalence estimates of multimorbidity: a comparative study of two sources. *BMC Health Serv Res*. 2010;10:111.
4. Lehnert T, Heider D, Leicht H, et al. Review: health care utilization and costs of elderly persons with multiple chronic conditions. *Med Care Res Rev*. 2011;68:387-420.
5. Perruccio AV, Katz JN, Losina E. Health burden in chronic disease: multimorbidity is associated with self-rated health more than medical comorbidity alone. *J Clin Epidemiol*. 2012;65:100-6.
6. Sinha SK. Living Longer, Living Well: Report submitted to the Minister of Health and Long-Term Care and the Minister Responsible for Seniors on recommendations to inform a Seniors Strategy for Ontario. 2012; [http://www.health.gov.on.ca/en/common/ministry/publications/reports/seniors\\_strategy/](http://www.health.gov.on.ca/en/common/ministry/publications/reports/seniors_strategy/). Accessed April 14, 2016.
7. World Health Organization. Good health adds life to years: Global brief for World Health Day 2012. 2012; <http://www.who.int/iris/handle/10665/70853>. Accessed July 31, 2015.
8. Roberts RO, Cha RH, Mielke MM, et al. Risk and protective factors for cognitive impairment in persons aged 85 years and older. *Neurology*. 2015;84:1854-61.
9. Vassilaki M, Aakre JA, Cha RH, et al. Multimorbidity and Risk of Mild Cognitive Impairment. *J Am Geriatr Soc*. 2015;63:1783-90.
10. Melis RJ, Marengoni A, Rizzuto D, et al. The influence of multimorbidity on clinical progression of dementia in a population-based cohort. *PLoS One*. 2013;8:e84014.
11. Doraiswamy PM, Leon J, Cummings JL, Marin D, Neumann PJ. Prevalence and impact of medical comorbidity in Alzheimer's disease. *J Gerontol A Biol Sci Med Sci*. 2002;57:M173-7.
12. Parekh AK, Goodman RA, Gordon C, Koh HK. Managing multiple chronic conditions: a strategic framework for improving health outcomes and quality of life. *Public Health Rep*. 2011;126:460-71.
13. von Elm E, Altman DG, Egger M, et al. The Strengthening the Reporting of Observational Studies in Epidemiology (STROBE) statement: guidelines for reporting observational studies. *Lancet*. 2007;370:1453-7.
14. Thompson S, James M, Wiebe N, et al. Cause of Death in Patients with Reduced Kidney Function. *J Am Soc Nephrol*. 2015;26:2504-11.
15. Tonelli M, Muntner P, Lloyd A, et al. Risk of coronary events in people with chronic kidney disease compared with those with diabetes: a population-level cohort study. *Lancet*. 2012;380:807-14.
16. Alexander RT, Hemmelgarn BR, Wiebe N, et al. Kidney stones and kidney function loss: a cohort study. *BMJ*. 2012;345:e5287.
17. Hemmelgarn BR, Clement F, Manns BJ, et al. Overview of the Alberta Kidney Disease Network. *BMC Nephrol*. 2009;10:30.
18. Diederichs C, Berger K, Bartels DB. The measurement of multiple chronic diseases--a systematic review on existing multimorbidity indices. *J Gerontol A Biol Sci Med Sci*. 2011;66:301-11.

19. Tonelli M, Wiebe N, Martin F, et al. Methods for identifying 30 chronic conditions: Application to administrative data. *BMC Med Inform Decis Mak.* 2015;15:31.
20. Quan H, Li B, Saunders LD, et al. Assessing validity of ICD-9-CM and ICD-10 administrative data in recording clinical conditions in a unique dually coded database. *Health Serv Res.* 2008;43:1424-41.
21. Stevens PE, Levin A, Kidney Disease: Improving Global Outcomes Chronic Kidney Disease Guideline Development Work Group M. Evaluation and management of chronic kidney disease: synopsis of the kidney disease: improving global outcomes 2012 clinical practice guideline. *Ann Intern Med.* 2013;158:825-30.
22. Tonelli M, Wiebe N, Guthrie B, et al. Comorbidity as a driver of adverse outcomes in people with chronic kidney disease. *Kidney Int.* 2015;88:859-66.
23. Solomon A, Dobranici L, Kareholt I, Tudose C, Lazarescu M. Comorbidity and the rate of cognitive decline in patients with Alzheimer dementia. *Int J Geriatr Psychiatry.* 2011;26:1244-51.
24. Select Committee on Public Service and Demographic Change. *Ready for ageing? Report.* London: House of Lords;2013.
25. Beard JR, Bloom DE. Towards a comprehensive public health response to population ageing. *Lancet.* 2015;385:658-61.
26. Banerjee S. Multimorbidity--older adults need health care that can count past one. *Lancet.* 2015;385:587-9.
27. Rechel B, Grundy E, Robine JM, et al. Ageing in the European Union. *Lancet.* 2013;381:1312-22.

1  
2  
3  
4  
5  
6  
7  
8  
9  
10  
11  
12  
13  
14  
15  
16  
17  
18  
19  
20  
21  
22  
23  
24  
25  
26  
27  
28  
29  
30  
31  
32  
33  
34  
35  
36  
37  
38  
39  
40  
41  
42  
43  
44  
45  
46  
47  
48  
49

**Table 1. Demographic and clinical characteristics at baseline**

| Characteristic            | All     | Age 65-74y |             | Age 75-84y |             | Age 85y+ |             |
|---------------------------|---------|------------|-------------|------------|-------------|----------|-------------|
|                           |         | Dementia   | No dementia | Dementia   | No dementia | Dementia | No dementia |
| N                         | 610,457 | 5,424      | 435,151     | 8,652      | 115,957     | 9,772    | 35,501      |
| Male                      | 46.8    | 50.3       | 49.6        | 39.1       | 42.5        | 27.6     | 33.8        |
| Aboriginal                | 1.4     | 3.1        | 1.6         | 0.6        | 0.6         | 0.4      | 0.5         |
| Rural                     | 14.8    | 13.2       | 15.7        | 10.6       | 13.3        | 10.7     | 11.8        |
| Non-dementia morbidities  | 2 (1,3) | 4 (2,5)    | 1 (0,3)     | 3 (2,5)    | 2 (1,3)     | 3 (2,5)  | 2 (1,4)     |
| None                      | 23.0    | 5.5        | 25.6        | 6.7        | 17.8        | 6.6      | 19.2        |
| One                       | 26.3    | 12.1       | 28.0        | 13.9       | 24.8        | 13.6     | 19.5        |
| Two                       | 21.0    | 15.0       | 21.1        | 15.9       | 21.8        | 18.2     | 19.6        |
| Three                     | 13.5    | 16.9       | 12.6        | 17.1       | 15.3        | 19.0     | 15.4        |
| Four                      | 7.6     | 14.0       | 6.5         | 14.6       | 9.2         | 14.9     | 10.8        |
| Five or more              | 8.7     | 36.6       | 6.2         | 31.8       | 11.2        | 27.7     | 15.5        |
| Alcohol misuse            | 2.3     | 19.1       | 2.2         | 8.5        | 1.5         | 3.1      | 0.9         |
| Asthma                    | 3.0     | 6.7        | 2.7         | 5.2        | 3.5         | 4.5      | 3.6         |
| Atrial fibrillation       | 6.9     | 11.9       | 4.5         | 19.5       | 10.6        | 23.4     | 15.5        |
| Cancer, lymphoma          | 0.5     | 0.9        | 0.5         | 0.7        | 0.6         | 0.4      | 0.5         |
| Cancer, metastatic        | 1.5     | 2.2        | 1.3         | 2.6        | 2.0         | 2.0      | 2.0         |
| Cancer, non-metastatic    | 5.8     | 6.0        | 5.2         | 8.6        | 7.4         | 7.1      | 6.8         |
| Chronic heart failure     | 8.7     | 20.5       | 5.1         | 28.1       | 13.3        | 37.3     | 24.1        |
| Chronic kidney disease    | 18.2    | 29.3       | 17.9        | 22.8       | 16.5        | 28.0     | 21.4        |
| Chronic pain              | 9.7     | 11.2       | 9.7         | 9.6        | 10.5        | 7.1      | 8.4         |
| Chronic pulmonary disease | 16.3    | 33.6       | 14.1        | 31.3       | 20.1        | 29.0     | 21.2        |
| Chronic viral hepatitis B | 0.1     | 0.2        | 0.1         | <0.1       | <0.1        | <0.1     | <0.1        |
| Cirrhosis                 | 0.2     | 1.3        | 0.2         | 0.4        | 0.1         | 0.1      | <0.1        |
| Constipation, severe      | 1.5     | 5.7        | 0.9         | 5.7        | 2.0         | 6.2      | 3.5         |
| Depression                | 7.3     | 34.5       | 6.5         | 27.2       | 6.9         | 19.5     | 6.8         |
| Diabetes                  | 16.8    | 29.6       | 16.8        | 23.6       | 16.6        | 17.5     | 13.1        |
| Epilepsy                  | 1.2     | 10.5       | 1.1         | 3.9        | 0.9         | 2.2      | 0.7         |
| Hypertension              | 54.1    | 62.1       | 50.6        | 65.3       | 62.3        | 65.0     | 62.2        |
| Hypothyroidism            | 11.3    | 16.3       | 10.5        | 18.0       | 12.4        | 18.8     | 13.5        |

| Characteristic              | All | Age 65-74y |             | Age 75-84y |             | Age 85y+ |             |
|-----------------------------|-----|------------|-------------|------------|-------------|----------|-------------|
|                             |     | Dementia   | No dementia | Dementia   | No dementia | Dementia | No dementia |
| Inflammatory bowel disease  | 0.8 | 1.2        | 0.9         | 0.9        | 0.6         | 0.7      | 0.4         |
| Irritable bowel syndrome    | 1.8 | 3.8        | 1.8         | 3.0        | 1.6         | 2.0      | 1.4         |
| Multiple sclerosis          | 0.5 | 3.8        | 0.6         | 1.0        | 0.3         | 0.6      | 0.2         |
| Myocardial infarction       | 4.3 | 7.9        | 3.8         | 8.0        | 5.1         | 7.2      | 5.8         |
| Parkinson's disease         | 1.4 | 10.6       | 0.7         | 10.8       | 1.9         | 8.2      | 2.4         |
| Peptic ulcer disease        | 0.4 | 1.5        | 0.3         | 1.6        | 0.7         | 1.2      | 0.8         |
| Peripheral vascular disease | 1.8 | 4.5        | 1.5         | 3.9        | 2.4         | 3.0      | 2.4         |
| Psoriasis                   | 0.7 | 1.6        | 0.7         | 0.9        | 0.6         | 0.7      | 0.5         |
| Rheumatoid arthritis        | 3.0 | 5.0        | 2.6         | 4.7        | 3.7         | 4.5      | 3.7         |
| Schizophrenia               | 0.9 | 16.2       | 0.7         | 6.0        | 0.4         | 3.4      | 0.3         |
| Stroke or TIA               | 9.6 | 30.8       | 6.9         | 33.8       | 12.6        | 33.6     | 17.8        |

N count, TIA transient ischemic attack

Percentages and median (inter-quartile range) as appropriate.

1  
2  
3  
4  
5  
6  
7  
8  
9  
10  
11  
12  
13  
14  
15  
16  
17  
18  
19  
20  
21  
22  
23  
24  
25  
26  
27  
28  
29  
30  
31  
32  
33  
34  
35  
36  
37  
38  
39  
40  
41  
42  
43  
44  
45  
46  
47  
48  
49

**Table 2. Adjusted risk multiplier for dementia by age and number of morbidities**

| Morbidities  | No of participant-years (%) | Mortality        | Physician visits | ED visits        | Hospitalizations   | Discharge to long-term care |
|--------------|-----------------------------|------------------|------------------|------------------|--------------------|-----------------------------|
|              |                             | HR (95%CI)       | RR (95%CI)       | RR (95%CI)       | RR (95%CI)         | HR (95%CI)                  |
| Age 65-74y   | 2,093,043                   |                  |                  |                  |                    |                             |
| None         | 409,872 (19.6)              | 6.38 (5.86,6.95) | 1.79 (1.73,1.85) | 2.40 (2.14,2.70) | 5.22 (4.38,6.22)   | 179.85 (127.52,253.66)      |
| One          | 514,511 (24.6)              | 5.02 (4.74,5.31) | 1.29 (1.27,1.32) | 2.07 (1.94,2.20) | 4.02 (3.70,4.38)   | 63.74 (53.52,75.91)         |
| Two          | 462,717 (22.1)              | 4.43 (4.23,4.63) | 1.23 (1.21,1.25) | 1.93 (1.84,2.02) | 3.14 (2.95,3.33)   | 28.52 (25.34,32.10)         |
| Three        | 320,038 (15.3)              | 3.41 (3.27,3.56) | 1.21 (1.19,1.23) | 1.65 (1.59,1.71) | 2.70 (2.57,2.83)   | 11.54 (10.51,12.68)         |
| Four         | 183,217 (8.8)               | 2.55 (2.44,2.66) | 1.20 (1.18,1.22) | 1.46 (1.41,1.51) | 2.19 (2.09,2.28)   | 5.41 (4.99,5.88)            |
| Five or more | 202,688 (9.7)               | 1.80 (1.76,1.84) | 1.20 (1.19,1.21) | 1.35 (1.33,1.38) | 1.79 (1.75,1.83)   | 2.16 (2.07,2.26)            |
| Age 75-84y   | 1,441,821                   |                  |                  |                  |                    |                             |
| None         | 146,923 (10.2)              | 4.68 (4.46,4.91) | 1.87 (1.83,1.92) | 2.80 (2.60,3.01) | 5.98 (5.36,6.67)   | 65.57 (48.64,88.40)         |
| One          | 240,053 (16.7)              | 3.66 (3.55,3.77) | 1.31 (1.29,1.32) | 1.95 (1.88,2.03) | 3.52 (3.33,3.72)   | 18.20 (15.93,20.79)         |
| Two          | 301,412 (20.9)              | 3.19 (3.12,3.27) | 1.23 (1.22,1.24) | 1.75 (1.70,1.80) | 2.99 (2.88,3.10)   | 6.41 (5.94,6.92)            |
| Three        | 271,780 (18.9)              | 2.74 (2.68,2.80) | 1.21 (1.20,1.22) | 1.54 (1.50,1.57) | 2.45 (2.38,2.53)   | 3.73 (3.52,3.95)            |
| Four         | 191,442 (13.3)              | 2.31 (2.26,2.36) | 1.20 (1.19,1.21) | 1.42 (1.39,1.45) | 2.03 (1.98,2.08)   | 2.12 (2.02,2.23)            |
| Five or more | 290,211 (20.1)              | 1.74 (1.72,1.76) | 1.20 (1.20,1.21) | 1.27 (1.25,1.28) | 1.61 (1.59,1.63)   | 1.30 (1.26,1.33)            |
| Age 85y+     | 610,548                     |                  |                  |                  |                    |                             |
| None         | 70,565 (11.6)               | 6.48 (6.18,6.79) | 4.48 (4.37,4.59) | 4.71 (4.33,5.12) | 10.48 (9.24,11.89) | 22.00 (17.15,28.24)         |
| One          | 60,779 (10.0)               | 2.20 (2.13,2.26) | 1.50 (1.48,1.52) | 1.73 (1.65,1.80) | 3.12 (2.93,3.32)   | 3.48 (3.13,3.88)            |
| Two          | 97,128 (15.9)               | 2.14 (2.10,2.19) | 1.35 (1.34,1.37) | 1.48 (1.44,1.52) | 2.53 (2.44,2.63)   | 2.29 (2.14,2.45)            |
| Three        | 107,891 (17.7)              | 2.03 (1.99,2.07) | 1.30 (1.29,1.31) | 1.27 (1.25,1.30) | 2.01 (1.95,2.07)   | 1.63 (1.56,1.72)            |
| Four         | 93,241 (15.3)               | 1.85 (1.81,1.88) | 1.26 (1.25,1.27) | 1.18 (1.16,1.20) | 1.60 (1.56,1.65)   | 1.26 (1.21,1.31)            |
| Five or more | 180,944 (29.6)              | 1.54 (1.52,1.55) | 1.23 (1.23,1.24) | 1.09 (1.07,1.10) | 1.32 (1.30,1.34)   | 1.08 (1.06,1.11)            |

CI confidence interval, HR hazard ratio, RR rate ratio, ED emergency department

Ratios are adjusted for sex, Aboriginal status, and rural/urban. These models include 3-way and 2-way interactions terms for dementia, age, and number of morbidity.



1  
2  
3  
4  
5  
6 The Table shows the likelihood of a two-fold increase in the risk of the outcomes with repeat events (i.e., physician visits, ED visits, hospitalizations) that is  
7 associated with dementia, along with the risk of mortality and discharge to long-term care. For example, in those who are aged 65-74y with no comorbidities,  
8 the presence of dementia is 1.83 times more likely to be associated with a two-fold increase in the number of physician visits, compared to those of similar age  
9 and with no comorbidities, but without dementia.  
10  
11  
12  
13  
14  
15  
16  
17  
18  
19  
20  
21  
22  
23  
24  
25  
26  
27  
28  
29  
30  
31  
32  
33  
34  
35  
36  
37  
38  
39  
40  
41  
42  
43  
44  
45  
46  
47  
48  
49

Confidential

Figure 1. Relative proportion with dementia in fiscal year 2011 by age and number of morbidities

1  
2  
3  
4  
5  
6  
7  
8  
9  
10  
11  
12  
13  
14  
15  
16  
17  
18  
19  
20  
21  
22  
23  
24  
25  
26  
27  
28  
29  
30  
31  
32  
33  
34  
35  
36  
37  
38  
39  
40  
41  
42  
43  
44  
45  
46  
47  
48  
49

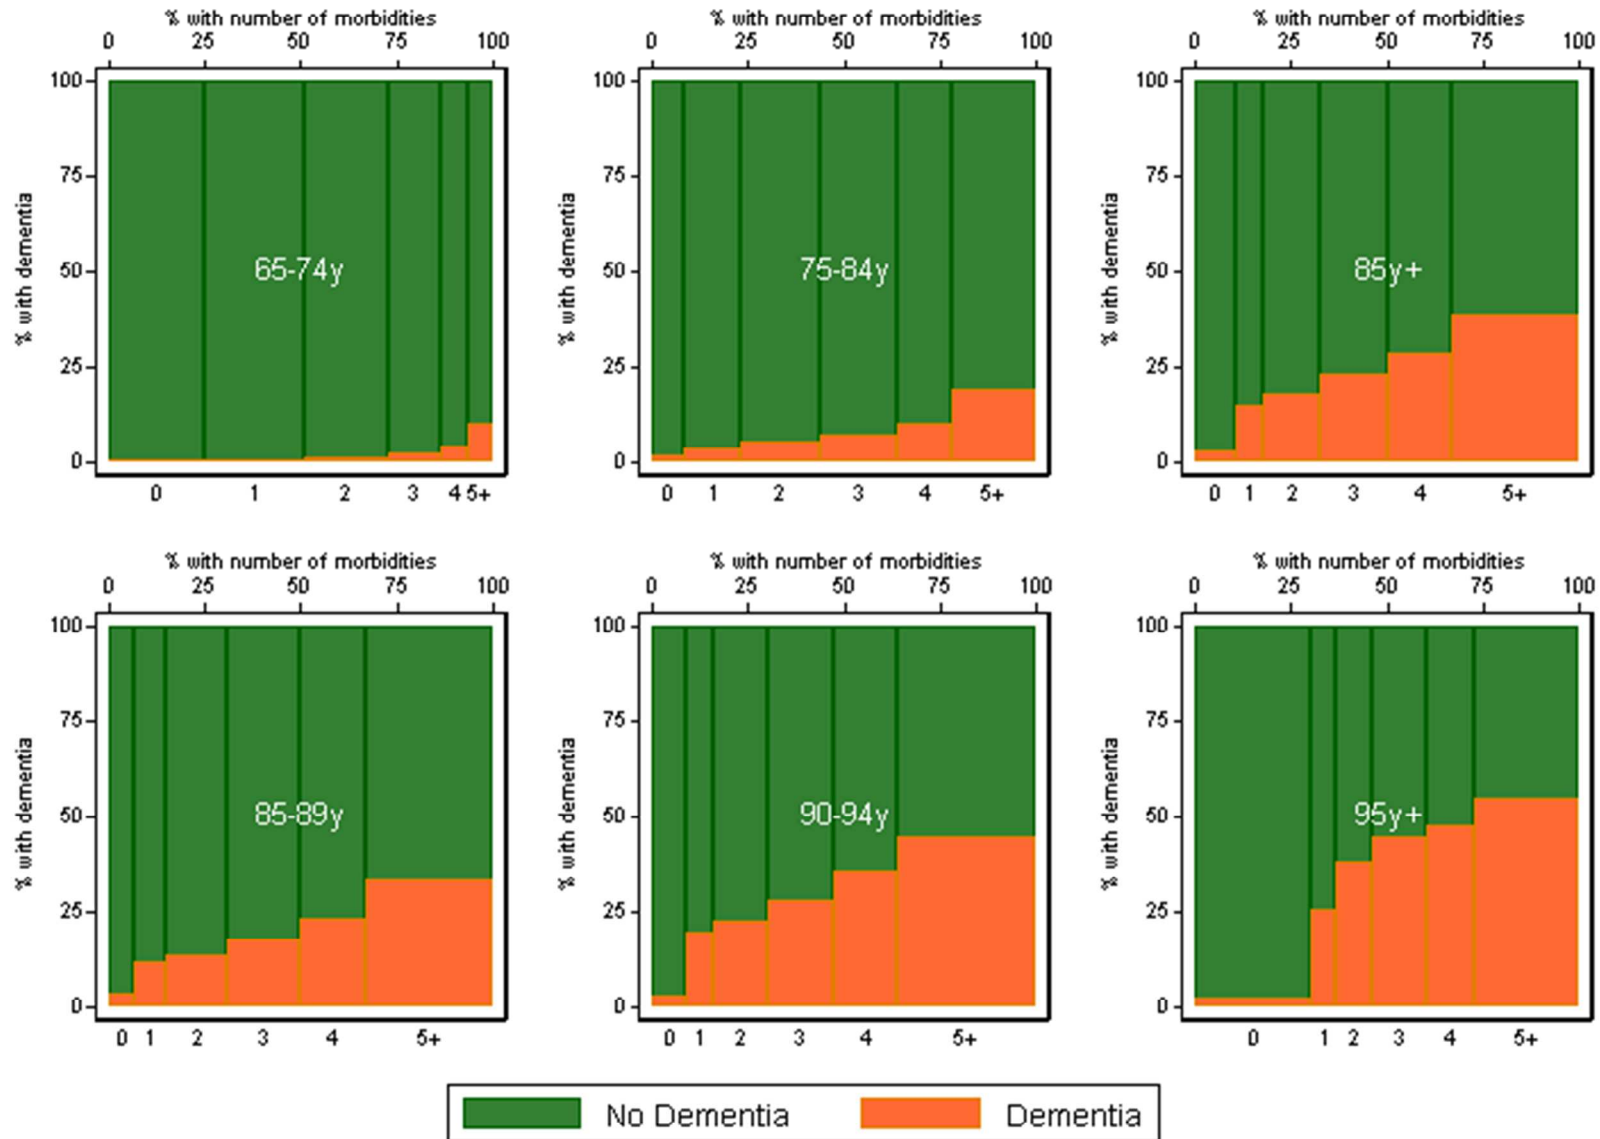

The top row, from left to right, shows participants aged 65-74y, aged 75-84y, and age 85y+. The bottom row, from left to right, shows participants aged 85-89y, aged 90-94y, and age 95y+. Within each graph, the bars from left to right show the number of morbidities that each group has, starting at 0 morbidities and ending at 5 or more. The width of each bar shows the percentage of participants in each group. The height of each bar shows the unadjusted percentage of participants with dementia (orange), and the percentage of participants without dementia (green).

Figure 2. Adjusted risk multiplier for number of morbidities by age and presence of dementia

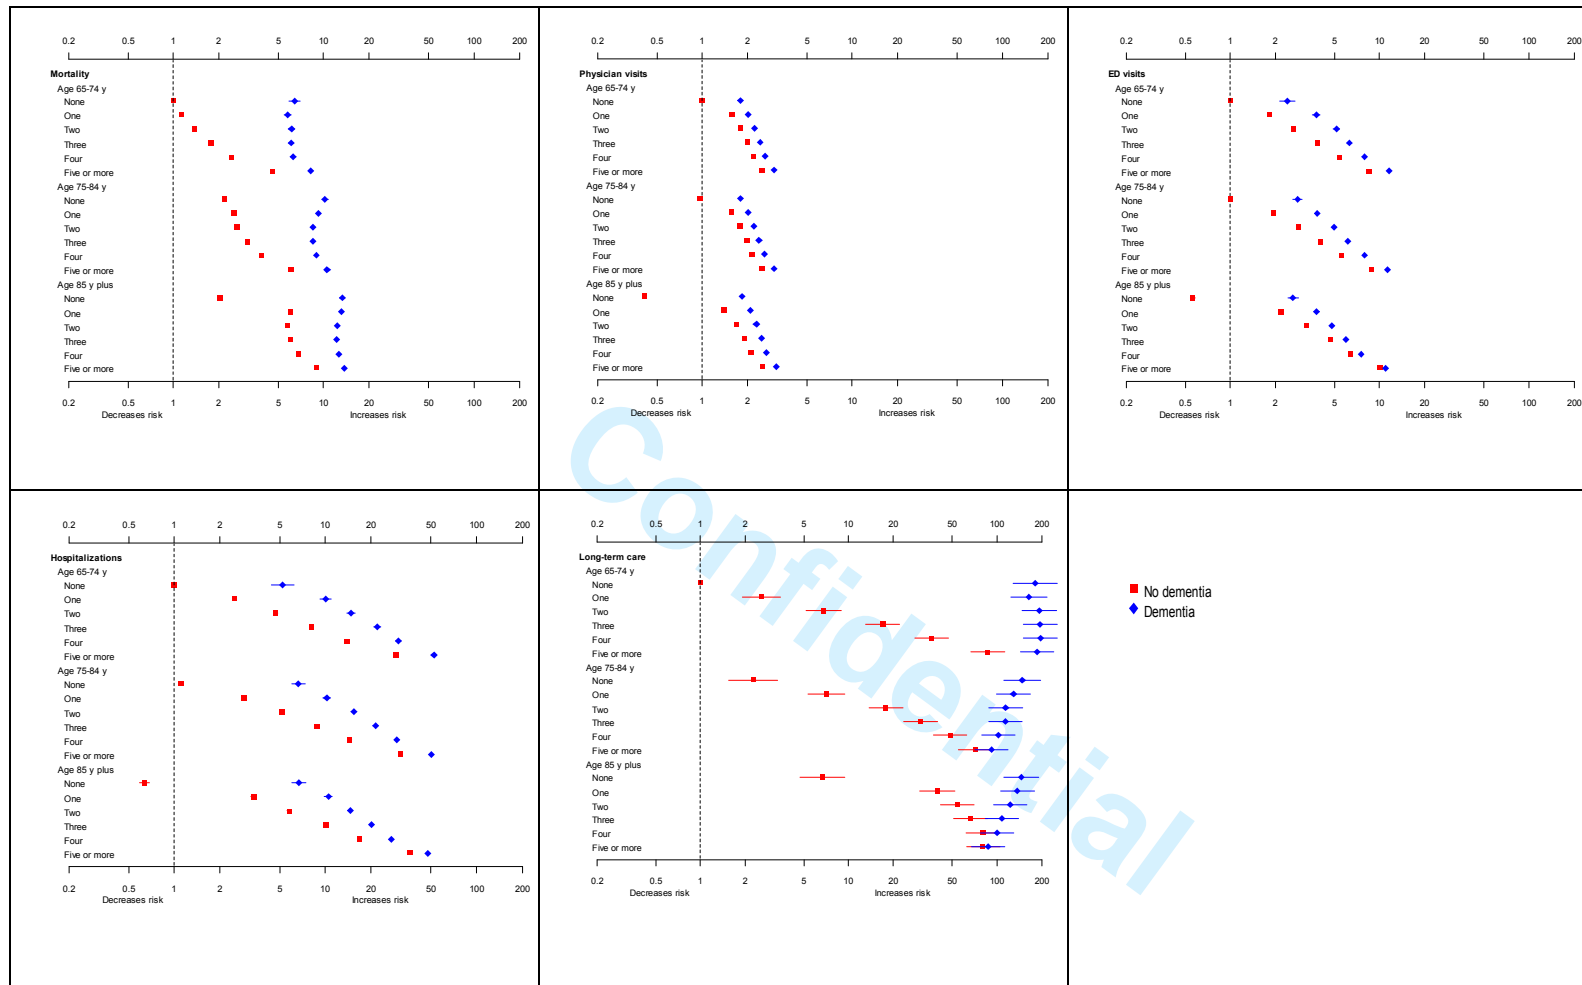

ED emergency department, LTC long-term care

The risk multipliers are presented by age, number of morbidities and dementia. They are adjusted for the number of morbidities, dementia, age, sex, Aboriginal status, and rural/urban, and are relative to people aged 65-74 years with no non-dementia morbidities. These models include 3-way and 2-way interactions terms for dementia, age, and number of morbidity. The first panel shows the hazards ratios for mortality in by the number of morbidities. The second, third, and fourth panels similarly show the rate ratios for physician visits, ED visits, and hospitalizations, respectively. The last panel shows the hazard ratios for discharge to long-term care from hospital. The blue diamond symbols show those with dementia and the red squares show those without dementia. The horizontal bars depict 95% confidence intervals.

Along with the risk of mortality and discharge to long-term care, the Figure shows the likelihood of a two-fold increase in the risk of the outcomes with repeat events (i.e., physician visits, ED visits, hospitalizations) that is associated with dementia. For example, in those, who are aged 65-74 with no dementia but one comorbidity is 1.57 times more likely to be associated with a two-fold increase in the number of physician visits, compared to those of similar age, also with no dementia but with no comorbidities.

1  
2  
3  
4  
5  
6  
7  
8  
9  
10  
11  
12  
13  
14  
15  
16  
17  
18  
19  
20  
21  
22  
23  
24  
25  
26  
27  
28  
29  
30  
31  
32  
33  
34  
35  
36  
37  
38  
39  
40  
41  
42  
43  
44  
45  
46  
47  
48  
49

Figure 3. Relative proportion of deaths vs discharges to long-term facility after 5 years by age, presence/absence of dementia, and number of morbidities

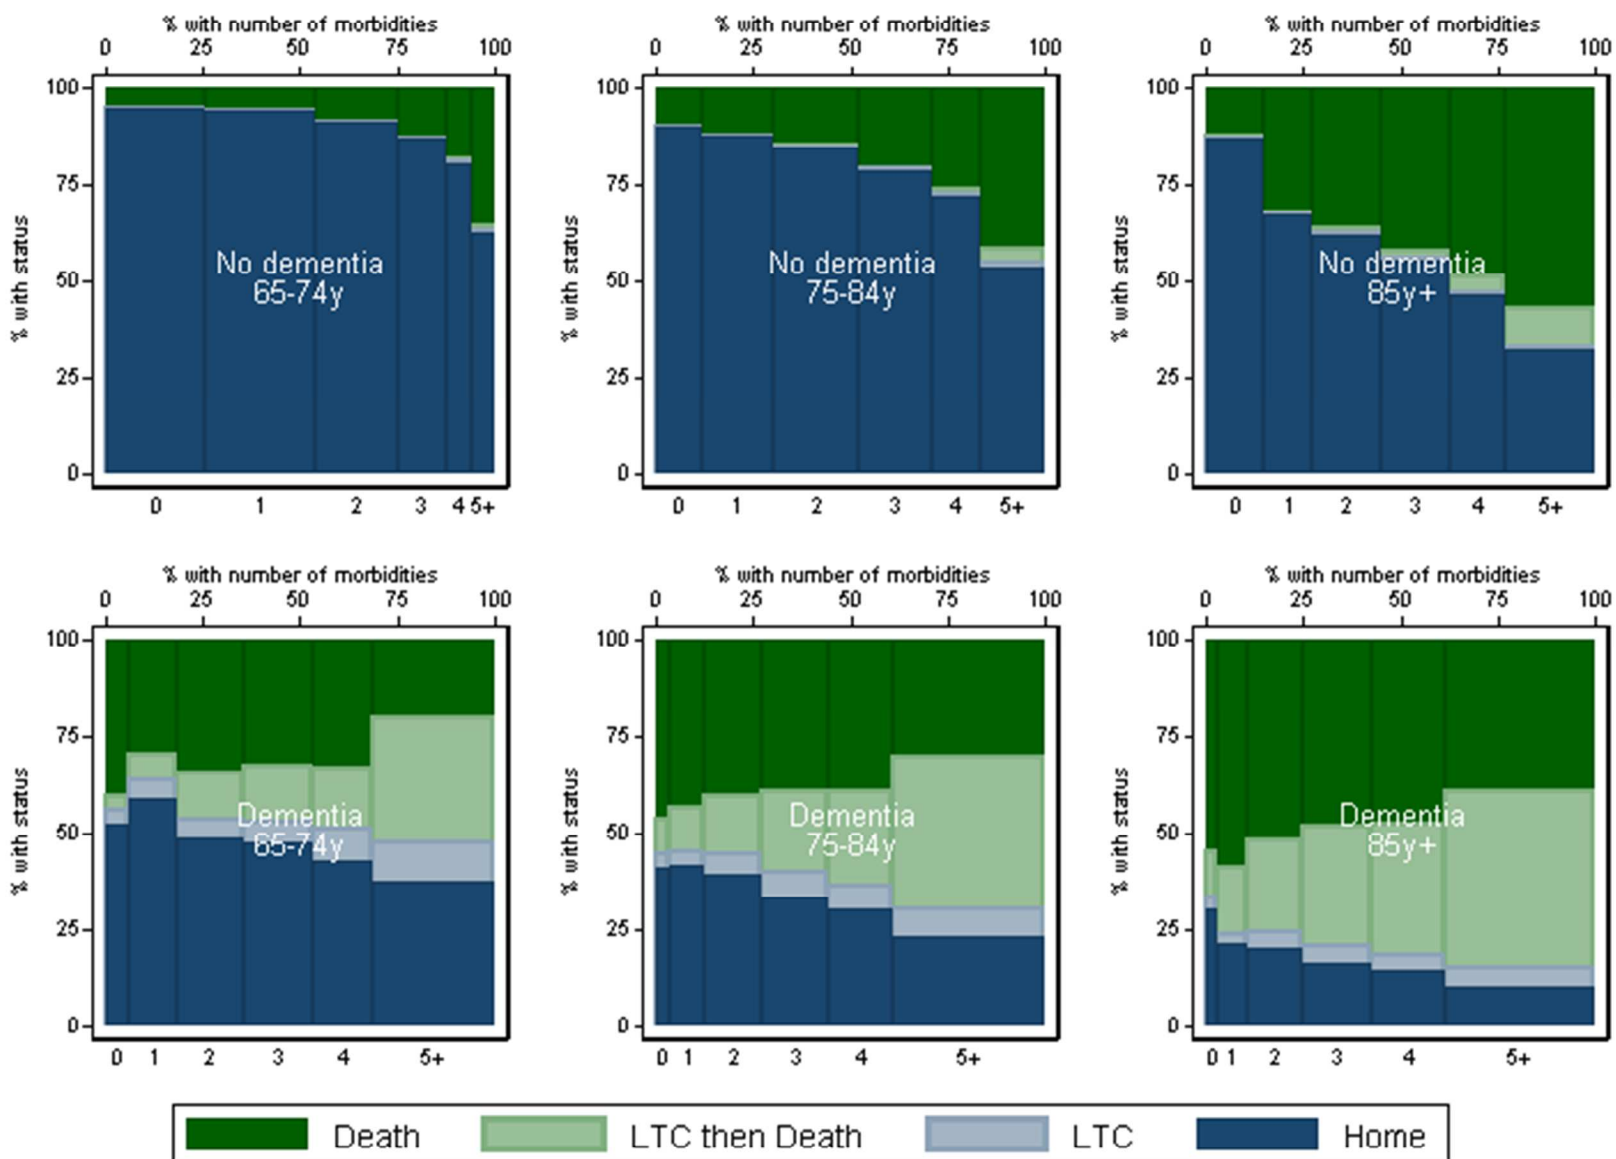

LTC long-term care

1 For this analysis, age and the presence/absence of dementia and other morbidities were assessed in fiscal year 2006. Clinical status (death; discharge to long-  
2 term care facility) was assessed 5 years later in fiscal year 2011. The top row shows participants with no dementia. The bottom row shows participants with  
3 dementia. The left-most column shows participants 65-74y, the middle column shows participants 75-84y, and the right-most column shows participants 85y+.  
4 Within each graph, the bars from left to right show the number of morbidities by group, starting at 0 morbidities and ending at 5 or more. The width of each  
5 bar shows the percentage of participants in each group. The height of each bar shows clinical status – the unadjusted percentage of participants that are alive  
6 without discharge to a long-term care facility (dark blue), alive but discharged to a long-term care placement after a hospitalization (light blue), deceased but  
7 discharged to a long-term care placement previously (light green), deceased and never discharged to a long-term care placement (dark green).  
8  
9  
10  
11  
12  
13  
14  
15  
16  
17  
18  
19  
20  
21  
22  
23  
24  
25  
26  
27  
28  
29  
30  
31  
32  
33  
34  
35  
36  
37  
38  
39  
40  
41  
42  
43  
44  
45  
46  
47  
48  
49

Confidential

Supplemental Table 1. Unadjusted event rates over follow-up

| Characteristic              | All     | Age 65-74y |             | Age 75-84y |             | Age 85y+ |             |
|-----------------------------|---------|------------|-------------|------------|-------------|----------|-------------|
|                             |         | Dementia   | No dementia | Dementia   | No dementia | Dementia | No dementia |
| N                           | 610,457 | 5,424      | 435,151     | 8,652      | 115,957     | 9,772    | 35,501      |
| Mortality                   | 21.6    | 43.6       | 10.5        | 59.6       | 22.4        | 75.7     | 39.2        |
| Physician visits            | 1,795.0 | 4,890.1    | 1,393.1     | 4,404.4    | 1,795.1     | 4,318.9  | 1,845.4     |
| ED visits                   | 70.7    | 148.3      | 55.1        | 140.5      | 73.4        | 127.0    | 89.2        |
| Hospitalizations            | 24.4    | 73.5       | 15.9        | 71.5       | 24.6        | 64.8     | 32.4        |
| Discharge to long-term care | 3.7     | 22.6       | 0.4         | 31.6       | 1.2         | 44.7     | 4.2         |

N count. Rates are per 100 person-years

ED emergency department

Confidential

1  
2  
3  
4  
5  
6  
7  
8  
9  
10  
11  
12  
13  
14  
15  
16  
17  
18  
19  
20  
21  
22  
23  
24  
25  
26  
27  
28  
29  
30  
31  
32  
33  
34  
35  
36  
37  
38  
39  
40  
41  
42  
43  
44  
45  
46  
47  
48  
49

**Supplemental Table 2. Adjusted risk multiplier for dementia by age and number of morbidities in the oldest participants**

| Morbidities  | No of participant-years (%) | Mortality           | Physician visits    | ED visits           | Hospitalizations    | Discharge to long-term care |
|--------------|-----------------------------|---------------------|---------------------|---------------------|---------------------|-----------------------------|
|              |                             | HR (95%CI)          | RR (95%CI)          | RR (95%CI)          | RR (95%CI)          | HR (95%CI)                  |
| Age 85-89 y  | 371,349                     |                     |                     |                     |                     |                             |
| None         | 31,025 (8.4)                | 4.37 (4.09,4.66)    | 3.47 (3.35,3.59)    | 4.06 (3.64,4.52)    | 7.79 (6.62,9.16)    | 35.15 (24.65,50.13)         |
| One          | 40,346 (10.9)               | 2.14 (2.06,2.23)    | 1.46 (1.43,1.48)    | 1.83 (1.74,1.94)    | 3.29 (3.04,3.56)    | 8.24 (7.00,9.69)            |
| Two          | 63,481 (17.1)               | 2.14 (2.08,2.20)    | 1.30 (1.29,1.32)    | 1.63 (1.57,1.69)    | 2.67 (2.54,2.81)    | 4.90 (4.43,5.42)            |
| Three        | 68,628 (18.5)               | 2.03 (1.98,2.09)    | 1.25 (1.24,1.27)    | 1.45 (1.41,1.49)    | 2.27 (2.18,2.36)    | 2.98 (2.76,3.21)            |
| Four         | 57,909 (15.6)               | 1.87 (1.82,1.92)    | 1.22 (1.20,1.23)    | 1.31 (1.27,1.34)    | 1.78 (1.71,1.84)    | 1.86 (1.75,1.98)            |
| Five or more | 109,960 (29.6)              | 1.53 (1.51,1.56)    | 1.21 (1.20,1.22)    | 1.21 (1.19,1.23)    | 1.47 (1.44,1.50)    | 1.29 (1.25,1.33)            |
| Age 90-94 y  | 168,388                     |                     |                     |                     |                     |                             |
| None         | 18,149 (10.8)               | 6.35 (5.85,6.89)    | 6.05 (5.79,6.33)    | 5.38 (4.66,6.22)    | 12.15 (9.67,15.27)  | 30.10 (19.04,47.57)         |
| One          | 15,026 (8.9)                | 1.96 (1.87,2.06)    | 1.67 (1.63,1.71)    | 1.72 (1.60,1.85)    | 2.94 (2.64,3.28)    | 4.44 (3.69,5.35)            |
| Two          | 25,454 (15.1)               | 1.86 (1.79,1.93)    | 1.43 (1.41,1.45)    | 1.44 (1.37,1.51)    | 2.51 (2.35,2.68)    | 2.53 (2.27,2.82)            |
| Three        | 29,431 (17.5)               | 1.77 (1.72,1.83)    | 1.34 (1.32,1.36)    | 1.22 (1.17,1.26)    | 1.87 (1.77,1.96)    | 1.93 (1.78,2.10)            |
| Four         | 26,489 (15.7)               | 1.64 (1.58,1.69)    | 1.29 (1.28,1.31)    | 1.15 (1.11,1.19)    | 1.56 (1.50,1.63)    | 1.40 (1.31,1.49)            |
| Five or more | 53,839 (32.0)               | 1.42 (1.39,1.45)    | 1.24 (1.23,1.26)    | 1.02 (1.00,1.04)    | 1.21 (1.18,1.24)    | 1.11 (1.07,1.15)            |
| Age 95 y+    | 70,811                      |                     |                     |                     |                     |                             |
| None         | 21,391 (30.2)               | 19.57 (17.36,22.06) | 25.60 (23.89,27.44) | 14.04 (11.17,17.65) | 26.93 (19.01,38.15) | 54.52 (31.64,93.94)         |
| One          | 5,407 (7.6)                 | 2.12 (1.97,2.29)    | 2.05 (1.96,2.13)    | 1.46 (1.29,1.65)    | 2.21 (1.84,2.66)    | 2.14 (1.72,2.67)            |
| Two          | 8,193 (11.6)                | 1.69 (1.60,1.79)    | 1.61 (1.57,1.66)    | 1.15 (1.06,1.24)    | 1.69 (1.50,1.89)    | 1.78 (1.54,2.06)            |
| Three        | 9,832 (13.9)                | 1.60 (1.52,1.68)    | 1.45 (1.42,1.49)    | 0.95 (0.89,1.01)    | 1.28 (1.17,1.39)    | 1.16 (1.05,1.29)            |
| Four         | 8,843 (12.5)                | 1.40 (1.33,1.48)    | 1.36 (1.33,1.39)    | 0.90 (0.85,0.95)    | 1.03 (0.95,1.11)    | 1.04 (0.95,1.14)            |
| Five or more | 17,145 (24.2)               | 1.35 (1.30,1.40)    | 1.29 (1.26,1.31)    | 0.90 (0.87,0.93)    | 1.02 (0.98,1.07)    | 0.98 (0.92,1.03)            |

CI confidence interval, HR hazard ratio, RR rate ratio, ED emergency department

Ratios are adjusted for sex, Aboriginal status, and rural/urban. These models include 3-way and 2-way interactions terms for dementia, age, and number of morbidities.

The Table shows the likelihood of a two-fold increase in the risk of the outcomes with repeat events (i.e., physician visits, ED visits, hospitalizations) that is associated with dementia, along with the risk of mortality and discharge to long-term care. For example, in those who are aged 85-89y with no comorbidities, the presence of dementia is 3.47 times more likely to be associated with a two-fold increase in the number of physician visits, compared to those of similar age and with no comorbidities, but without dementia.

1  
2  
3  
4  
5  
6  
7  
8  
9  
10  
11  
12  
13  
14  
15  
16  
17  
18  
19  
20  
21  
22  
23  
24  
25  
26  
27  
28  
29  
30  
31  
32  
33  
34  
35  
36  
37  
38  
39  
40  
41  
42  
43  
44  
45  
46  
47  
48  
49

**Supplemental Figure 1. Participant flow diagram**

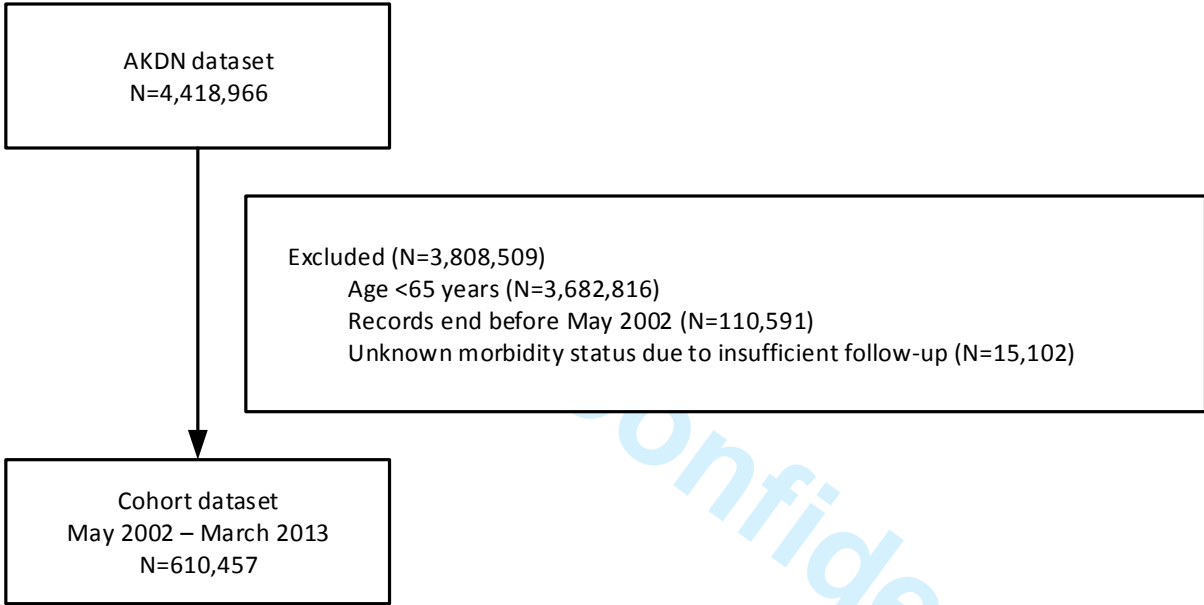

AKDN Alberta Kidney Disease Network

Confidential
